# Supplementary material for: Spatially explicit re-harmonized terrestrial carbon densities for calibrating Integrated human-Earth System Models
Source: Copernicus journal article supplement (doi:10.5194/essd-2023-251), 2023-07-17
Supplement: Supplementary file 1 [file essd-2023-251-supplement.pdf]

*Supplementary information for “Spatially explicit re-harmonized terrestrial carbon densities for calibrating Integrated Multisectoral Models”*

**Contents:**

- 1. Supplementary figures (Pg 1-4)**
- 2. Supplementary tables (Pg 5-6)**

**SI Figure 1:** *Map of 699 land regions (207 country boundaries intersected with 235 basins)*

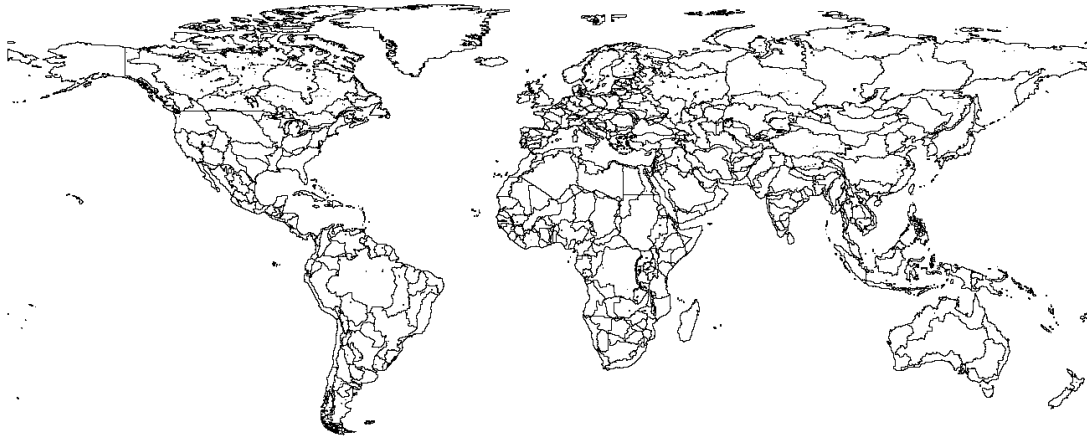

**SI Figure 2:** *Topsoil (0-30 cms) carbon densities in MgC/ha by land cover type for the Q3 state. Carbon values are shown here for unmanaged land types.*

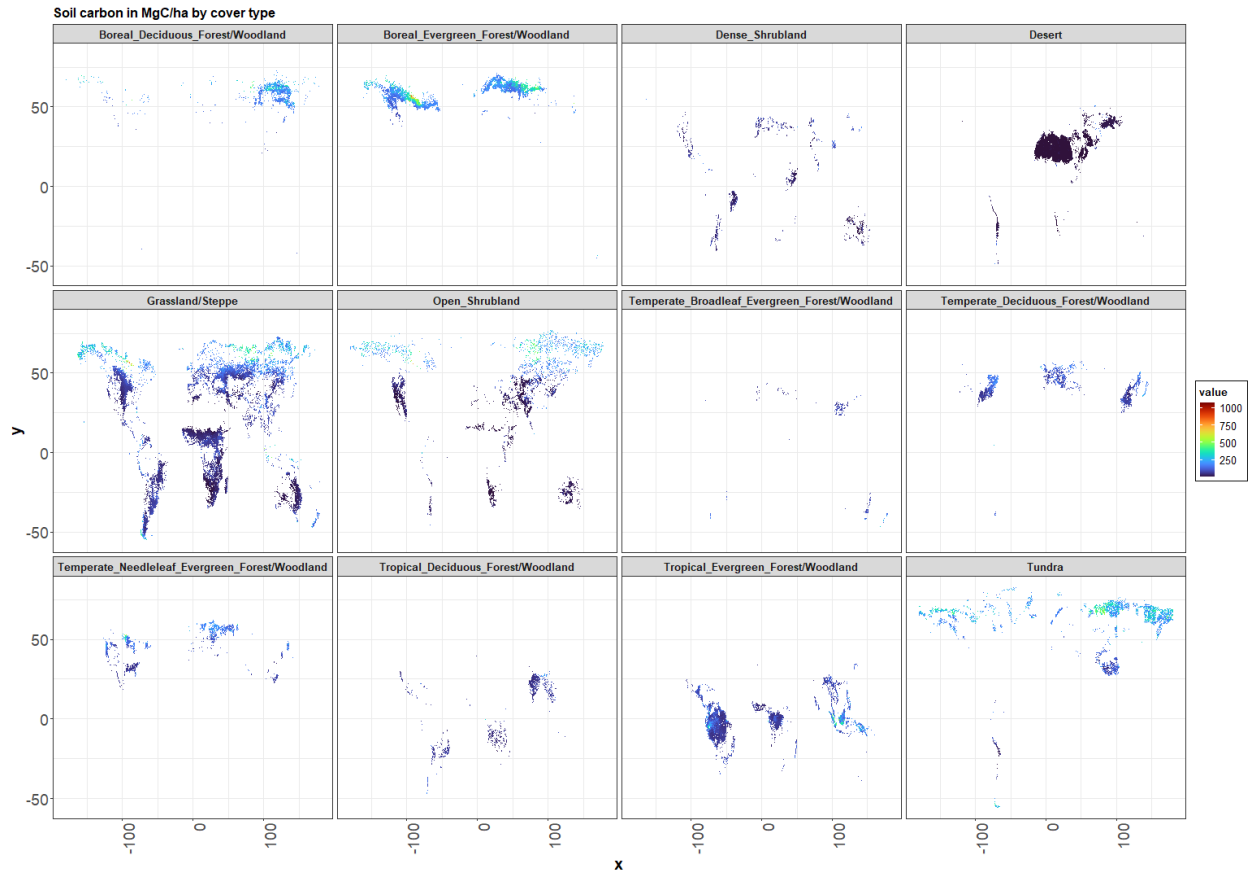

**SI Figure 3:** *vegetation (above ground biomass) carbon densities in MgC/ha by land cover type for the Q3 state. Carbon values are shown here for unmanaged land types.*

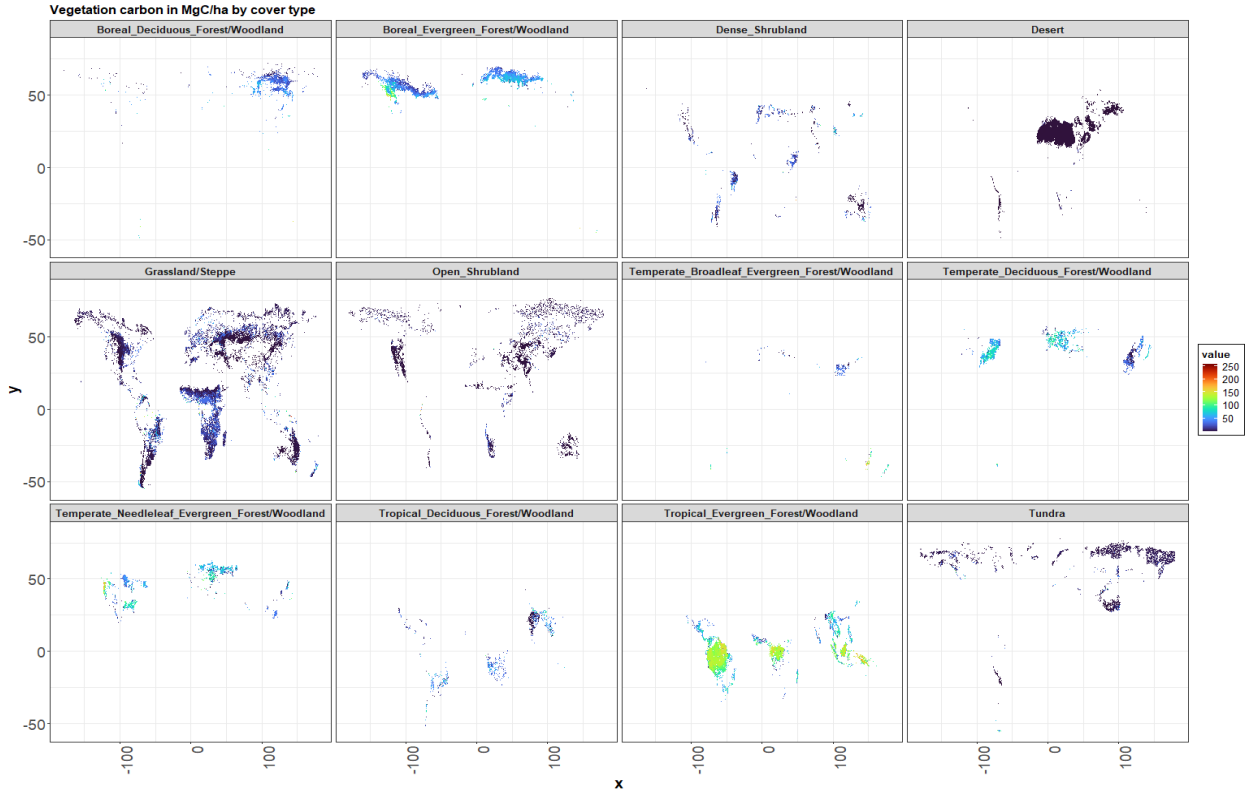

SI Figure 4: QCD values calculated for below ground biomass by basin, land type (facet).

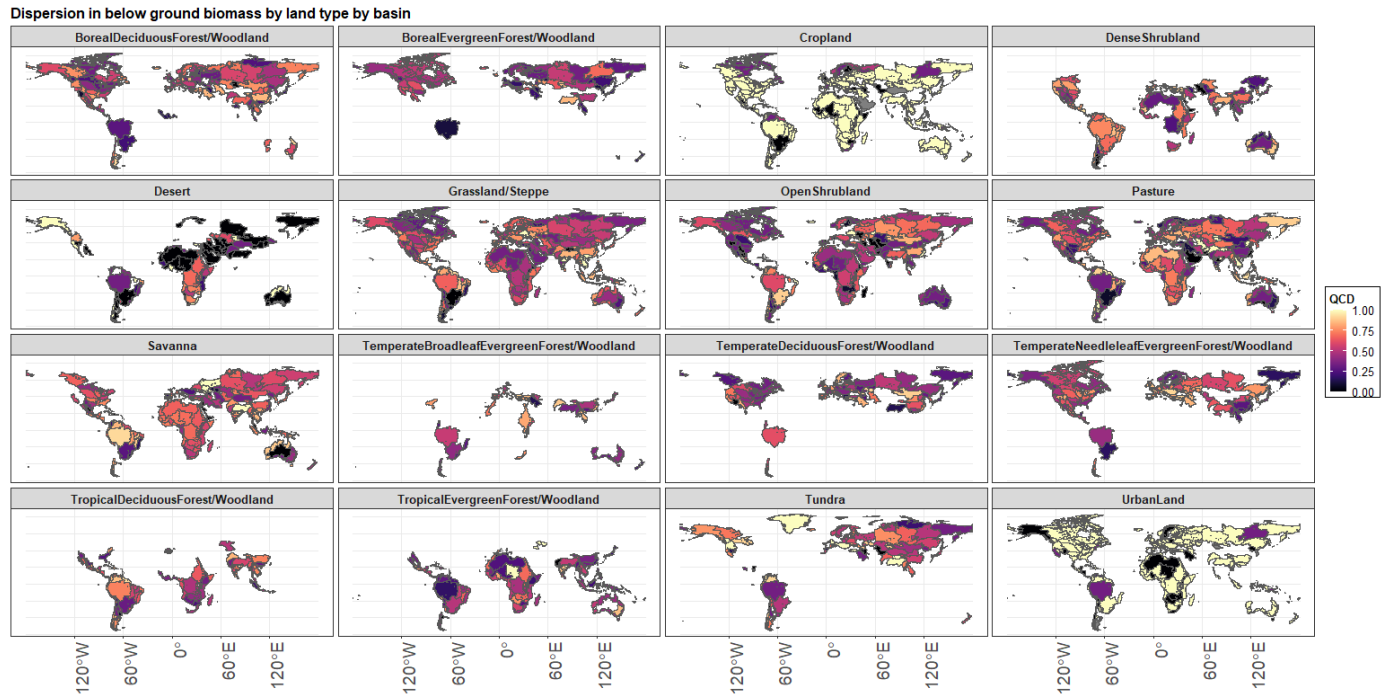

**SI Table 1: Global moirai carbon densities by state (topsoil carbon in MgC/ha)**

| Land type                                   | weighted_average | median_value | min_value | max_value | q1_value | q3_value |
|---------------------------------------------|------------------|--------------|-----------|-----------|----------|----------|
| BorealDeciduousForest/Woodland              | 189.5            | 176.8        | 47.3      | 671.2     | 139.6    | 239.1    |
| BorealEvergreenForest/Woodland              | 218.2            | 199.2        | 53.0      | 743.3     | 153.0    | 283.6    |
| Cropland                                    | 70.4             | 85.5         | 38.1      | 302.4     | 69.4     | 110.6    |
| DenseShrubland                              | 51.1             | 47.8         | 20.2      | 209.6     | 37.1     | 63.1     |
| Desert                                      | 13.1             | 12.2         | 10.2      | 130.9     | 11.6     | 14.2     |
| Grassland/Steppe                            | 124.3            | 129.4        | 38.5      | 449.5     | 101.2    | 173.3    |
| OpenShrubland                               | 98.1             | 103.1        | 25.4      | 394.9     | 80.9     | 138.4    |
| Pasture                                     | 53.0             | 59.2         | 20.8      | 267.7     | 44.4     | 81.8     |
| Savanna                                     | 58.9             | 54.9         | 24.4      | 231.6     | 44.3     | 70.5     |
| TemperateBroadleafEvergreenForest/Woodland  | 101.2            | 93.1         | 43.1      | 314.8     | 79.1     | 115.9    |
| TemperateDeciduousForest/Woodland           | 120.1            | 111.3        | 50.8      | 361.1     | 91.1     | 137.4    |
| TemperateNeedleleafEvergreenForest/Woodland | 137.0            | 126.0        | 52.2      | 524.7     | 104.5    | 164.0    |
| TropicalDeciduousForest/Woodland            | 72.3             | 64.6         | 33.1      | 241.0     | 54.5     | 81.6     |
| TropicalEvergreenForest/Woodland            | 101.1            | 90.5         | 32.5      | 474.8     | 68.4     | 126.8    |
| Tundra                                      | 174.4            | 223.4        | 49.6      | 515.1     | 179.0    | 283.2    |
| UrbanLand                                   | 61.4             | 87.8         | 43.5      | 307.5     | 71.6     | 113.7    |

**SI Table 2: Global moirai carbon densities by state (aboveground biomass carbon in MgC/ha)**

| Land type                                   | weighted_average | median_value | min_value | max_value | q1_value | q3_value |
|---------------------------------------------|------------------|--------------|-----------|-----------|----------|----------|
| BorealDeciduousForest/Woodland              | 40.8             | 38.8         | 0.34      | 136.5     | 20.1     | 62.0     |
| BorealEvergreenForest/Woodland              | 54.2             | 52.6         | 0.06      | 171.4     | 30.2     | 79.3     |
| Cropland                                    | 1.3              | 0.9          | 0.04      | 8.2       | 0.3      | 2.2      |
| DenseShrubland                              | 30.9             | 24.7         | 0.65      | 188.8     | 10.0     | 53.4     |
| Desert                                      | 1.2              | 1.1          | 0.19      | 35.8      | 1.0      | 1.3      |
| Grassland/Steppe                            | 16.9             | 10.6         | 0.32      | 139.4     | 6.8      | 28.3     |
| OpenShrubland                               | 9.5              | 7.1          | 0.19      | 120.6     | 4.2      | 14.0     |
| Pasture                                     | 12.1             | 9.5          | 0.32      | 121.2     | 4.9      | 22.0     |
| Savanna                                     | 28.4             | 17.4         | 0.91      | 162.9     | 10.6     | 42.9     |
| TemperateBroadleafEvergreenForest/Woodland  | 66.9             | 63.4         | 0.48      | 224.2     | 39.0     | 90.2     |
| TemperateDeciduousForest/Woodland           | 61.4             | 60.8         | 1.14      | 159.9     | 35.4     | 84.8     |
| TemperateNeedleleafEvergreenForest/Woodland | 66.2             | 67.1         | 0.48      | 168.6     | 33.6     | 96.8     |
| TropicalDeciduousForest/Woodland            | 44.7             | 36.2         | 0.87      | 183.2     | 18.0     | 65.0     |
| TropicalEvergreenForest/Woodland            | 119.7            | 122.6        | 0.25      | 257.4     | 86.8     | 152.4    |
| Tundra                                      | 8.7              | 4.2          | 0.09      | 14.5      | 4.2      | 14.5     |
| UrbanLand                                   | 1.2              | 0.8          | 0.02      | 6.6       | 0.2      | 1.9      |
